# Supplementary material for: IL-9/STAT3/fatty acid oxidation–mediated lipid peroxidation contributes to Tc9 cell longevity and enhanced antitumor activity
Source: JCI journal article supplement (doi:10.1172/jci153247), 2022-02-22

**Supplementary Figure 1. Tc9 cells have lower ROS production and similar ROS scavenging ability compared to Tc1 cells.**

(A) Survival condition of Tc1 or Tc9 cells treated mice (n = 7). (B) Polarized Tc1 and Tc9 cells were treated with TBH (100  $\mu$ M) and then washed with PBS. Cellular ROS levels were detected and ROS scavenging rates [(ROS level at 0.5 hour - ROS level at 1.5 hours) / Time] are shown (n = 3). (C) Polarized Tc1 and Tc9 cells were treated with N-Acetyl Cysteine (NAC, 50  $\mu$ M) and then washed with PBS. Cellular ROS levels were detected and ROS production rates [(ROS level at 17 hour - ROS level at 1 hour) / Time] are shown (n = 3). Data are presented as mean  $\pm$  SEM. \*p < 0.05; \*\*\*p < 0.001 with log-rank (Mantel–Cox) test in A and unpaired 2-tailed Student's *t* test in other panels.

**Supplementary Figure 2. Persistence of adoptively transferred CD8<sup>+</sup> T cells in TME is negatively correlated with their lipid peroxidation.**

(A) Tumor-infiltrating Tc1 or Tc9 cells were divided into PD-1<sup>+</sup> and PD-1<sup>-</sup> groups and analyzed for the ratio of PD-1<sup>+</sup> and PD-1<sup>-</sup> (n = 10). (B) GSEA of exhaustion associated gene enrichment in tumor-infiltrating Tc1 or Tc9 cells. (C-F) Thy1.1<sup>+</sup> Pmel-1 Tc1 or Tc9 cells were i.v. injected into s.c. B16 tumor-bearing Thy1.2<sup>+</sup> B6 mice with adjuvant treatments. Thy1.1<sup>+</sup> percentages in CD8<sup>+</sup> T cell and relative lipid ROS of Tc1 and Tc9 cells in peripheral blood and spleens (n = 8-10). (G-J) Thy1.1<sup>+</sup> Pmel-1 Tc1 or Tc9 cells were i.v. injected into MC38-gp100 tumor-bearing Thy1.2<sup>+</sup> B6 mice with adjuvant treatments. Tumor growth curve, Thy1.1<sup>+</sup> percentages in CD8<sup>+</sup> T cell, and relative lipid ROS of Tc1 and Tc9 in spleens (n = 6). (K-M) Thy1.1<sup>+</sup> Pmel-1 Tc1 or Tc9 cells were i.v. injected into Thy1.2<sup>+</sup> B6 mice bearing lung B16 tumors. Tumor foci in lung, Thy1.1<sup>+</sup> CD8<sup>+</sup> T cell percentages, and relative lipid ROS of Tc1 and Tc9 in spleens (n = 6). Data are presented as mean  $\pm$  SEM. \*p < 0.05; \*\*p < 0.01; \*\*\*p < 0.001 with unpaired 2-tailed Student's *t* test.

**Supplementary Figure 3. Reduced lipid peroxidation and ferroptosis are required for the persistence of Tc1 and Tc9 cells in TME.**

(A-C) Mouse CD8<sup>+</sup> T cells were isolated from Pmel-1 Thy1.1<sup>+</sup> B6 mice and polarized with Hgp100<sub>25-33</sub> peptide under corresponding conditions. Relative *Trf* and *Tfrc* mRNA expression, relative lipid ROS and iron level in Tc1 and Tc9 cells on day 4 of polarization. (D-E) Polarized mouse Tc1 and Tc9 cells were cultured with IL-2 for another 5 days and then re-stimulated with CD3/CD28 antibodies. Relative lipid ROS and cell death are shown. (F) Relative cell viability in polarized mouse Tc1 and Tc9 cells treated with Fin56 under indicated concentrations. (G-H) Relative lipid ROS and Thy1.1<sup>+</sup> percentages in CD8<sup>+</sup> T cell from peripheral blood of indicate treated Tc9 cells as Figure 2J (n = 5). (I-J) Thy1.1<sup>+</sup> Pmel-1 Tc1 cells treated with RSL3 (0.05 μM) or Fer-1 (5 μM) were injected into B16 tumor-bearing Thy1.2<sup>+</sup> B6 mice with adjuvant treatments. Relative lipid ROS, Thy1.1<sup>+</sup> percentages in CD8<sup>+</sup> T and Thy1.1<sup>+</sup> CD8<sup>+</sup> T numbers of indicated Tc1 cells in tumor tissues on day 40 after tumor cell injection (n = 5). Data are presented as mean ± SEM. \*p < 0.05; \*\*p < 0.01. \*\*\*p < 0.001 with 1-way ANOVA followed by Dunnett's test in H, I, J, 2-way ANOVA in F and unpaired 2-tailed Student's *t* test in other panels.

**Supplementary Figure 4. Positive correlation between ferroptosis and dysfunction in human melanoma CD8<sup>+</sup> T cells.**

(A) Kaplan–Meier analysis (log-rank test) of overall survival in *IL9* high or *IL9* low melanoma, colon cancer and breast cancer patients with high CD8<sup>+</sup> infiltrates (see Method). (B-C) Melanoma patients' tumor-infiltrating CD8<sup>+</sup> T cells were divided into dysfunctional and non-dysfunctional groups from previous study. GSEA and heatmap analyses of lipid peroxidation and ferroptosis activation-related genes in these different groups. (D-E) Melanoma patients were divided into non-responders and responders who received PD-1 or CTLA-4 checkpoint immunotherapy by analyzing previous data. GSEA and heatmap analyses of lipid peroxidation and ferroptosis activation-related genes in non-responders and responders.

**Supplementary Figure 5. Tc9 cells display increased fatty acid oxidation activity compared to Tc1 cells.**

(A-C) Relative lipid ROS, iron level, and relative cell viability in Tc1 and Tc9 treated with FFA or AA for 16 hours on day 4 of polarization (n = 6). (D) Heatmap analysis of fatty acid synthesis- and uptake- related genes in tumor-infiltrating Tc1 or Tc9 cells on day 14 after injection. (E-F) Relative mRNA expression of fatty acid  $\beta$ -oxidation-, synthesis- and uptake- related genes (n = 3). (G) Cpt1a expression in polarized Tc1 or Tc9 cells from WT mice on day 4 of polarization (n = 3). Data are presented as mean  $\pm$  SEM. \*p < 0.05; \*\*\*p < 0.001 with 1-way ANOVA followed by Dunnett's test in A, B, C, and unpaired 2-tailed Student's *t* test in other panels.

**Supplementary Figure 6. Increased fatty acid oxidation and mitochondrial activity are required for reduced lipid peroxidation and ferroptosis in Tc9 cells.**

(A) MitoTracker intensity in polarized Tc1 and Tc9 cells (n = 6). (B-C) ECAR values at indicated treatments and basal OCR/ECAR ratio in Tc1 and Tc9 cells. (n = 6-8). (D) TMRM<sup>high</sup> ratio and intensity in tumor-infiltrating Tc1 and Tc9 cells from s.c. B16 tumor-bearing mice (n=10). (E) TMRM intensity in Tc1 and Tc9 cells from spleens of s.c. B16 tumor-bearing mice (n=10). (F) CPT1A expression in scramble- and *Cpt1a* shRNA lentivirus-transduced Tc9 cells. or vector- and *Cpt1a* overexpressing (OE) retrovirus-transduced Tc9 cells in N (n = 2). (G) TMRM intensity, relative lipid ROS and cell viability in scramble shRNA- or Cpt1a shRNA lentivirus-transduced Tc9 cells treated with RSL3 (0.05  $\mu$ M) or TBH (60  $\mu$ M) for 16h. (H) CPT1A expression vector- and *Cpt1a* overexpressing (OE) retrovirus-transduced Tc9 cells (n = 2). FFA: free fatty acids, AA: arachidonic acid. Data are presented as mean  $\pm$  SEM. \*p < 0.05; \*\*\*p < 0.001 with two-tailed unpaired *t* test.

**Supplementary Figure 7. IL9/STAT3 signaling induces Cpt1a expression in Tc9 cells.**

(A) IPA result of JAK/Stat pathway in tumor-infiltrating Tc1 and Tc9 cells on day 14 after injection. Red: upregulation. (B) Cpt1a expression in Stattic-treated Tc9 cells on day 4 of polarization. (C) p-STAT3 and Cpt1a expression in polarized Tc9 cells treated with IL-6 (30 nM) for 16 hours (n = 4). (D) Relative *Il6*, *Il10*, *Il27* and *Il9* mRNA expression in Tc1 and Tc9 cells on day 4 of polarization (n = 3). (E) IPA result of the crosstalk of STAT3 pathway and IL-9 signaling in tumor-infiltrating Tc9 cells. Data are presented as mean  $\pm$  SEM. \*p < 0.05; \*\*\*p < 0.001 with 1-way ANOVA followed by Dunnett's test in B and unpaired 2-tailed Student's *t* test in other panels.

**Supplementary Figure 8. IL-9 signaling up-regulates fatty acid oxidation to resist tumor or ROS induced ferroptosis in Tc9 cells.**

(A) LC-MS analysis of indicated saturated, mono-unsaturated, and poly-unsaturated fatty acid contents in naïve CD8<sup>+</sup> T cells isolated from WT or *Il9*<sup>-/-</sup> mice before polarization (n=2). (B) Cpt1a expression in naïve CD8<sup>+</sup> T cells in A (n=2). (C) LC-MS analysis of indicated saturated, mono-unsaturated, and poly-unsaturated fatty acid contents in polarized Tc1 or Tc9 from WT or *Il9*<sup>-/-</sup> mice on day 4 of polarization (n=2). (D-G) TMRM intensity, cellular ROS level, relative lipid ROS, iron level and relative cell viability in polarized Tc9 cells from indicated mice treated with ROS inducer TBH for 16 hours (n = 3). (H-J) TMRM intensity, cellular ROS level, relative lipid ROS, iron level and relative cell viability in vector- or Cpt1a overexpression transduced Tc9 cells from indicated mice treated with ROS inducer TBH for 16 hours (n = 3). (K-M) TMRM intensity, cellular ROS level, relative lipid ROS, iron level and relative cell viability in vector- or Cpt1a overexpression transduced Tc9 cells from indicated mice after co-culture with B16 cells for 48 hours (n = 3). Data are presented as mean  $\pm$  SEM. \*p < 0.05; \*\*p < 0.01; \*\*\*p < 0.001 with 1-way ANOVA followed by Dunnett's test.

**Figure 9. IL9 signaling deficiency dampens longevity of Tc9 cells in peripheral blood.**

Thy1.1<sup>+</sup> Pmel-1 Tc9 cells from Pmel-1-WT, *-Il9<sup>-/-</sup>* and *-Il9r<sup>-/-</sup>* mice were injected into Thy1.2<sup>+</sup> B6 mice bearing 10-day s.c. B16 tumor as Figure 6A. **(A)** Relative lipid ROS, **(B)** iron level, **(C)** TMRM intensity, **(D)** Thy1.1<sup>+</sup> percentages in CD8<sup>+</sup> T cells of transferred T cells in peripheral blood (n = 5). Data are presented as mean ± SEM. \*p < 0.05; \*\*p < 0.01 with 1-way ANOVA followed by Dunnett's test.

**Figure 10. Inhibiting STAT3-fatty acid oxidation pathway in Tc9 cells impairs their longevity in peripheral blood.**

**(A-E)** Thy1.1<sup>+</sup> Pmel-1 Tc9 cells were treated with DMSO (Ctrl), p-STAT3 inhibitor Stattic (0.5 μM), fatty acid oxidation inhibitor etomoxir (Eto, 50 μM), or ferroptosis inhibitor Fer-1 (5 μM) and then injected into Thy1.2<sup>+</sup> B6 mice bearing 10-day s.c. B16 tumor as Figure 7A. Relative lipid ROS, iron level, TMRM intensity, Thy1.1<sup>+</sup> percentages in CD8<sup>+</sup> T cells of transferred T cells in peripheral blood (n = 5-6). **(F-H)** Thy1.1<sup>+</sup> Pmel-1 Tc9 cells were overexpressed with vector or *Cpt1a* and injected into Thy1.2<sup>+</sup> B6 mice bearing 10-day s.c. B16 tumor as Figure 7H. Relative lipid ROS, TMRM intensity, Thy1.1<sup>+</sup> percentages in CD8<sup>+</sup> T cells of transferred T cells in peripheral blood (n = 6). **(I-M)** Thy1.1<sup>+</sup> Pmel-1 Tc1 or Tc9 cells from WT mice transduced with vector or *Cpt1a* were injected into B16 tumor bearing Thy1.2<sup>+</sup> B6 mice with adjuvant treatments. Relative lipid ROS, TMRM intensity, Thy1.1<sup>+</sup> percentages in CD8<sup>+</sup> T cells and Thy1.1<sup>+</sup> CD8<sup>+</sup> T cells numbers, tumor growth curve, and the expression of PD-1 and LAG-3 on transferred CD8<sup>+</sup> Thy1.1<sup>+</sup> T cells in tumors (n = 5). **(N)** Schematic diagram shows that IL/9/STAT3/fatty acid oxidation mediated lower lipid peroxidation contributed to Tc9 cell longevity and enhanced antitumor activity. Eto: Etomoxir, OE: overexpressing. Data are presented as mean ± SEM. \*p < 0.05; \*\*p < 0.01; \*\*\*p < 0.001 with 1-way ANOVA followed by Dunnett's test in **A, B, E**, 1-way ANOVA followed by Turkey's test in **I, J, K, M**, 2-way ANOVA in **L** and unpaired 2-tailed Student's *t* test in other panels.

Supplementary Figure 1

A

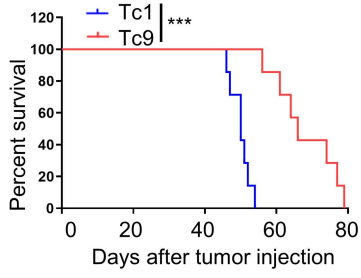

B

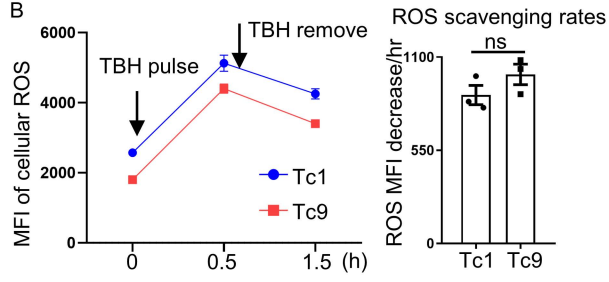

C

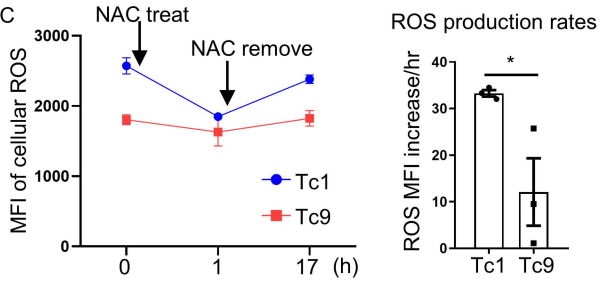

Supplementary Figure 2

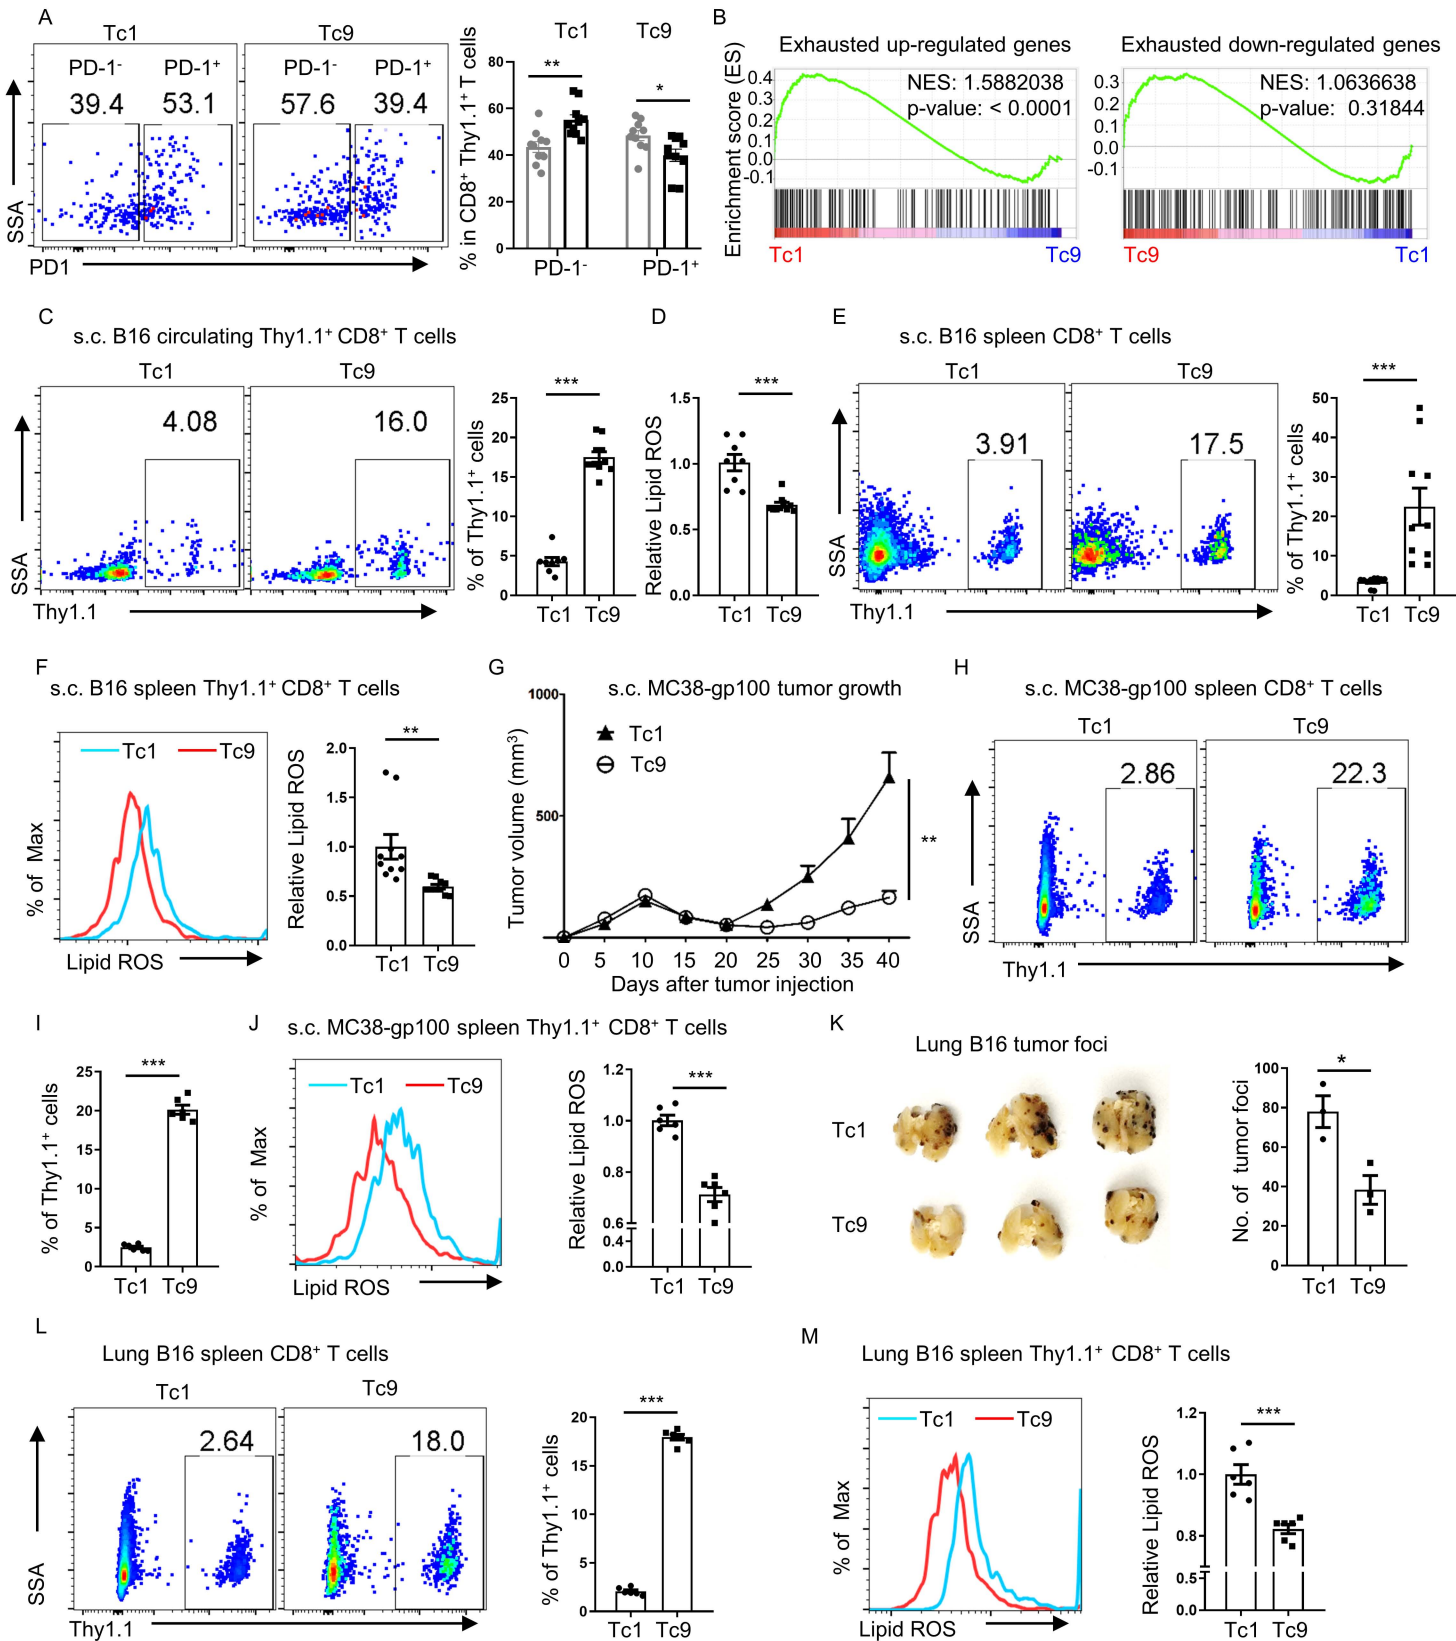

Supplementary Figure 3

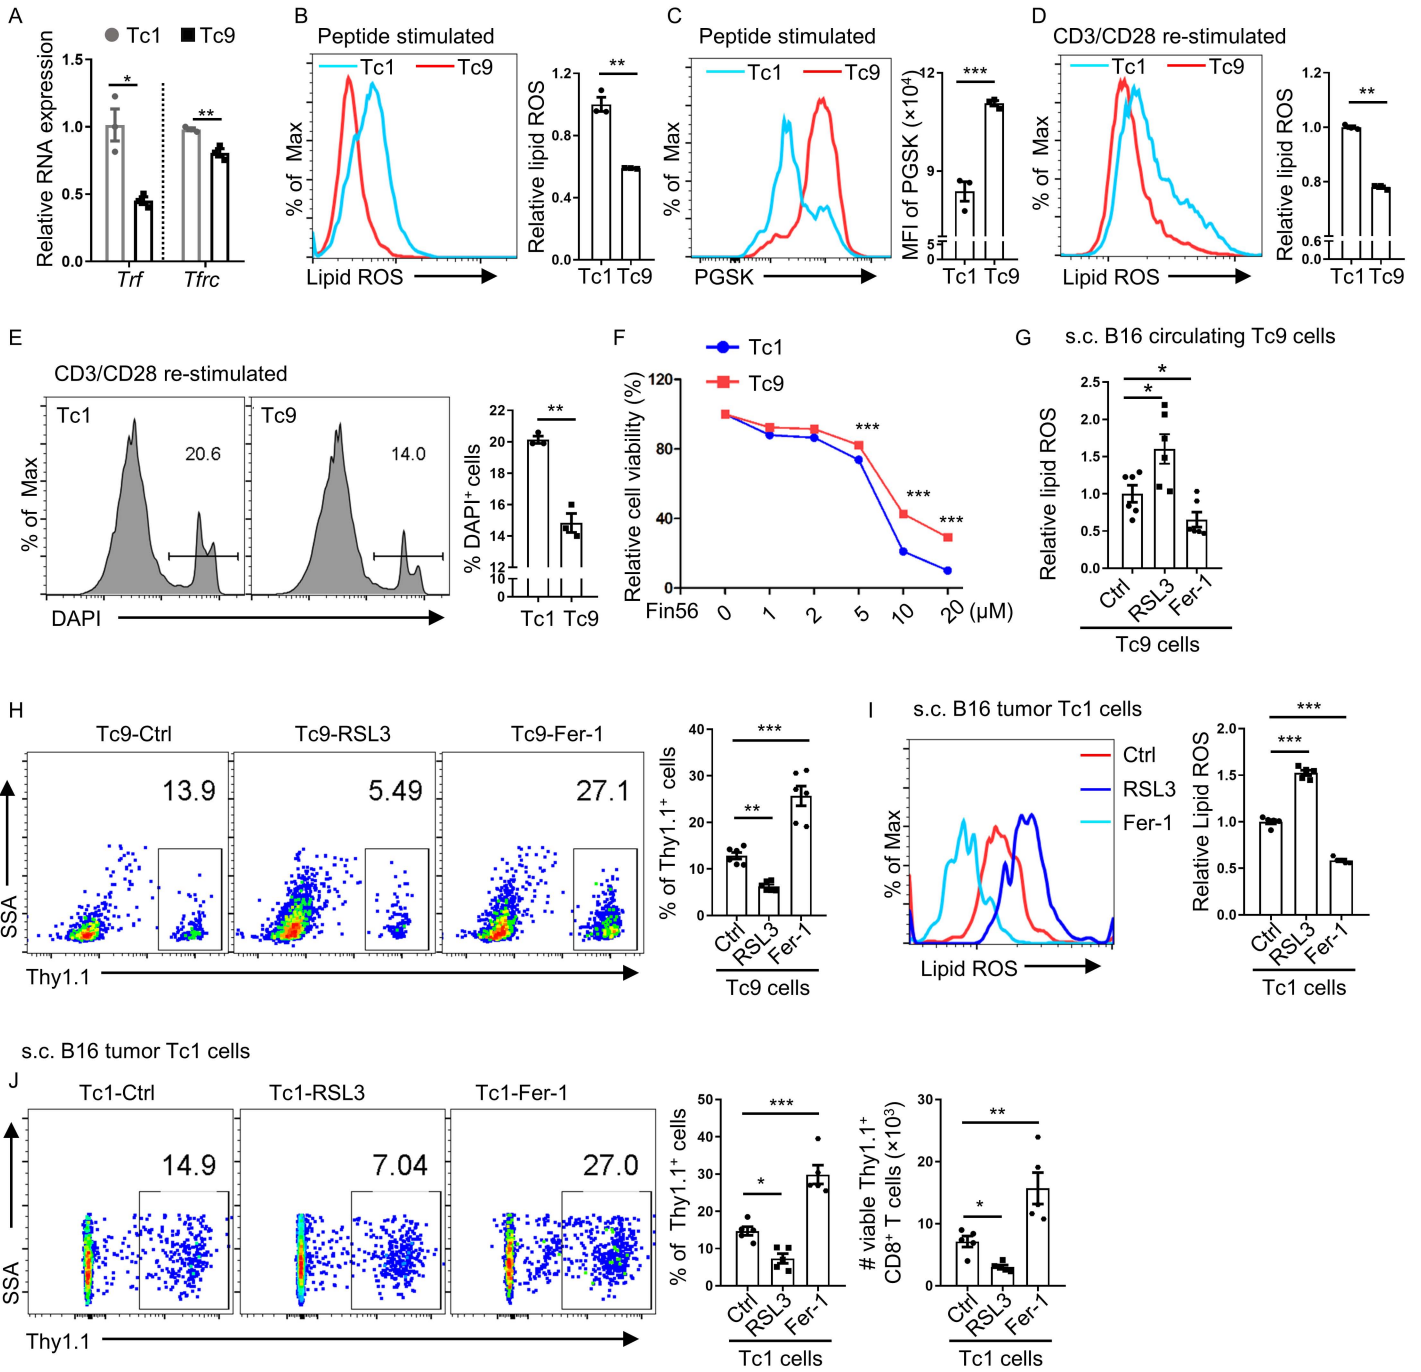



Supplementary Figure 4

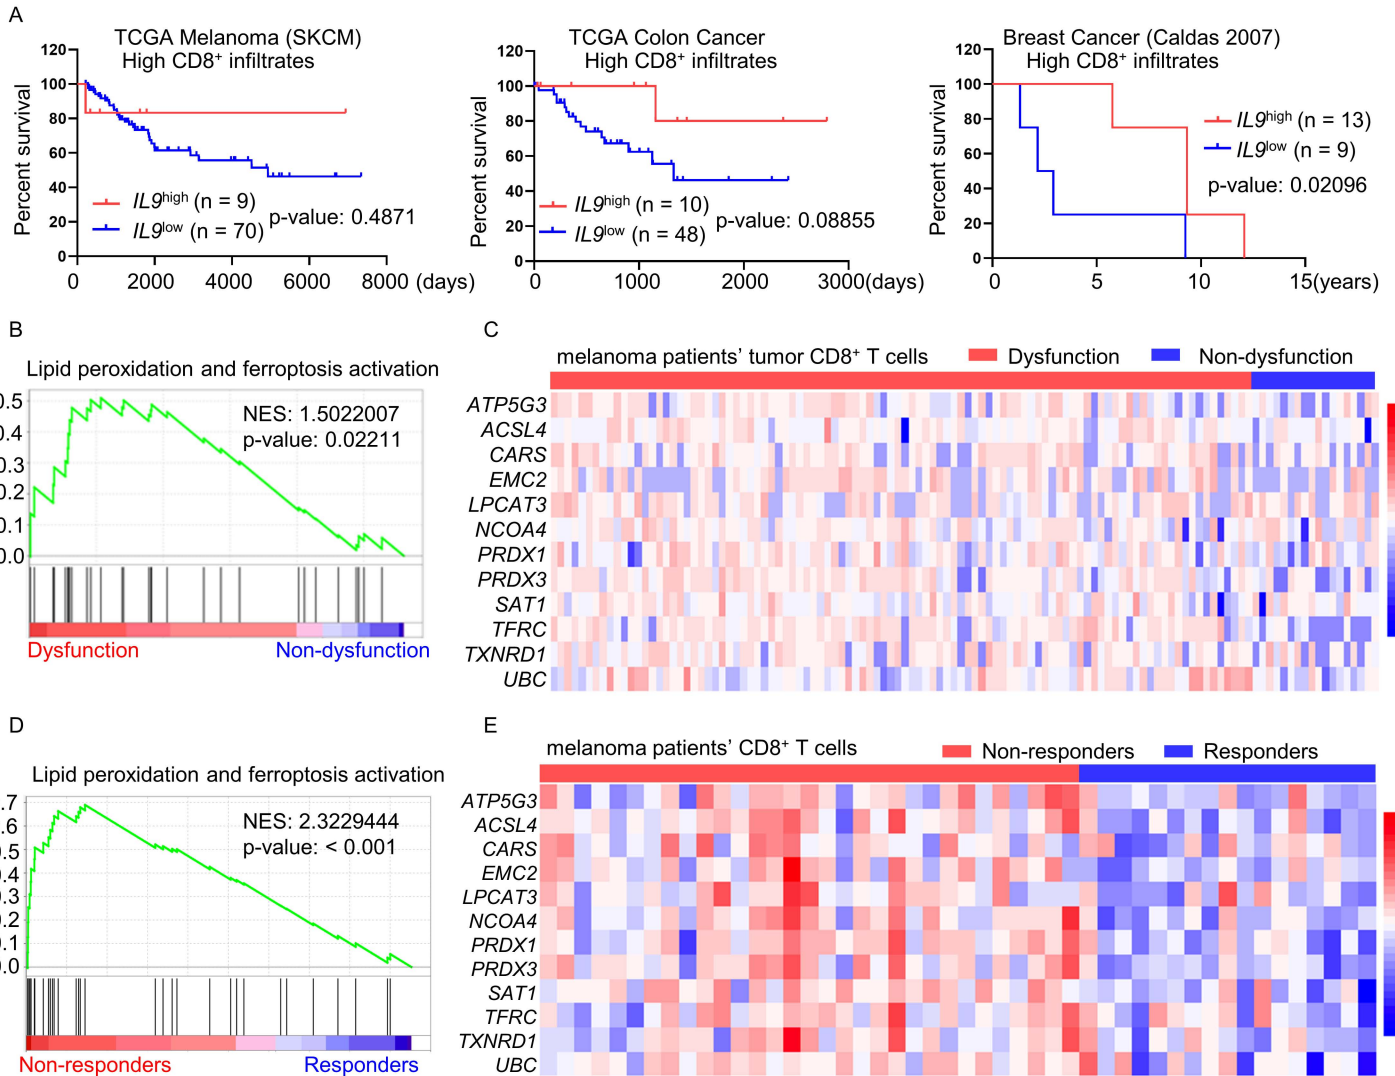

Supplementary Figure 5

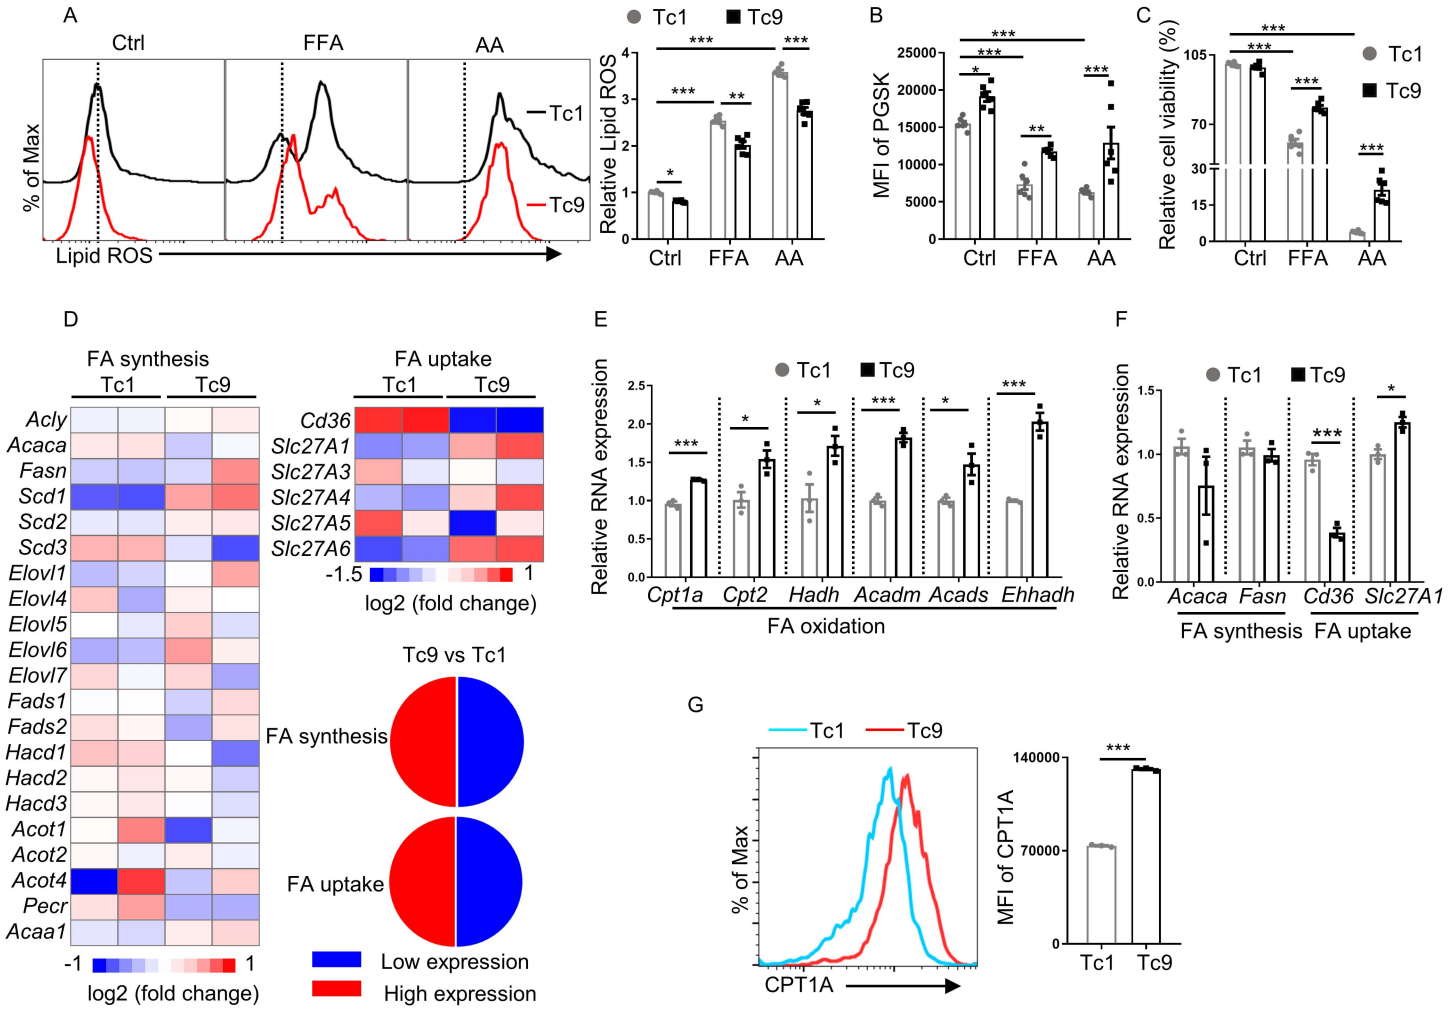

Supplementary Figure 6

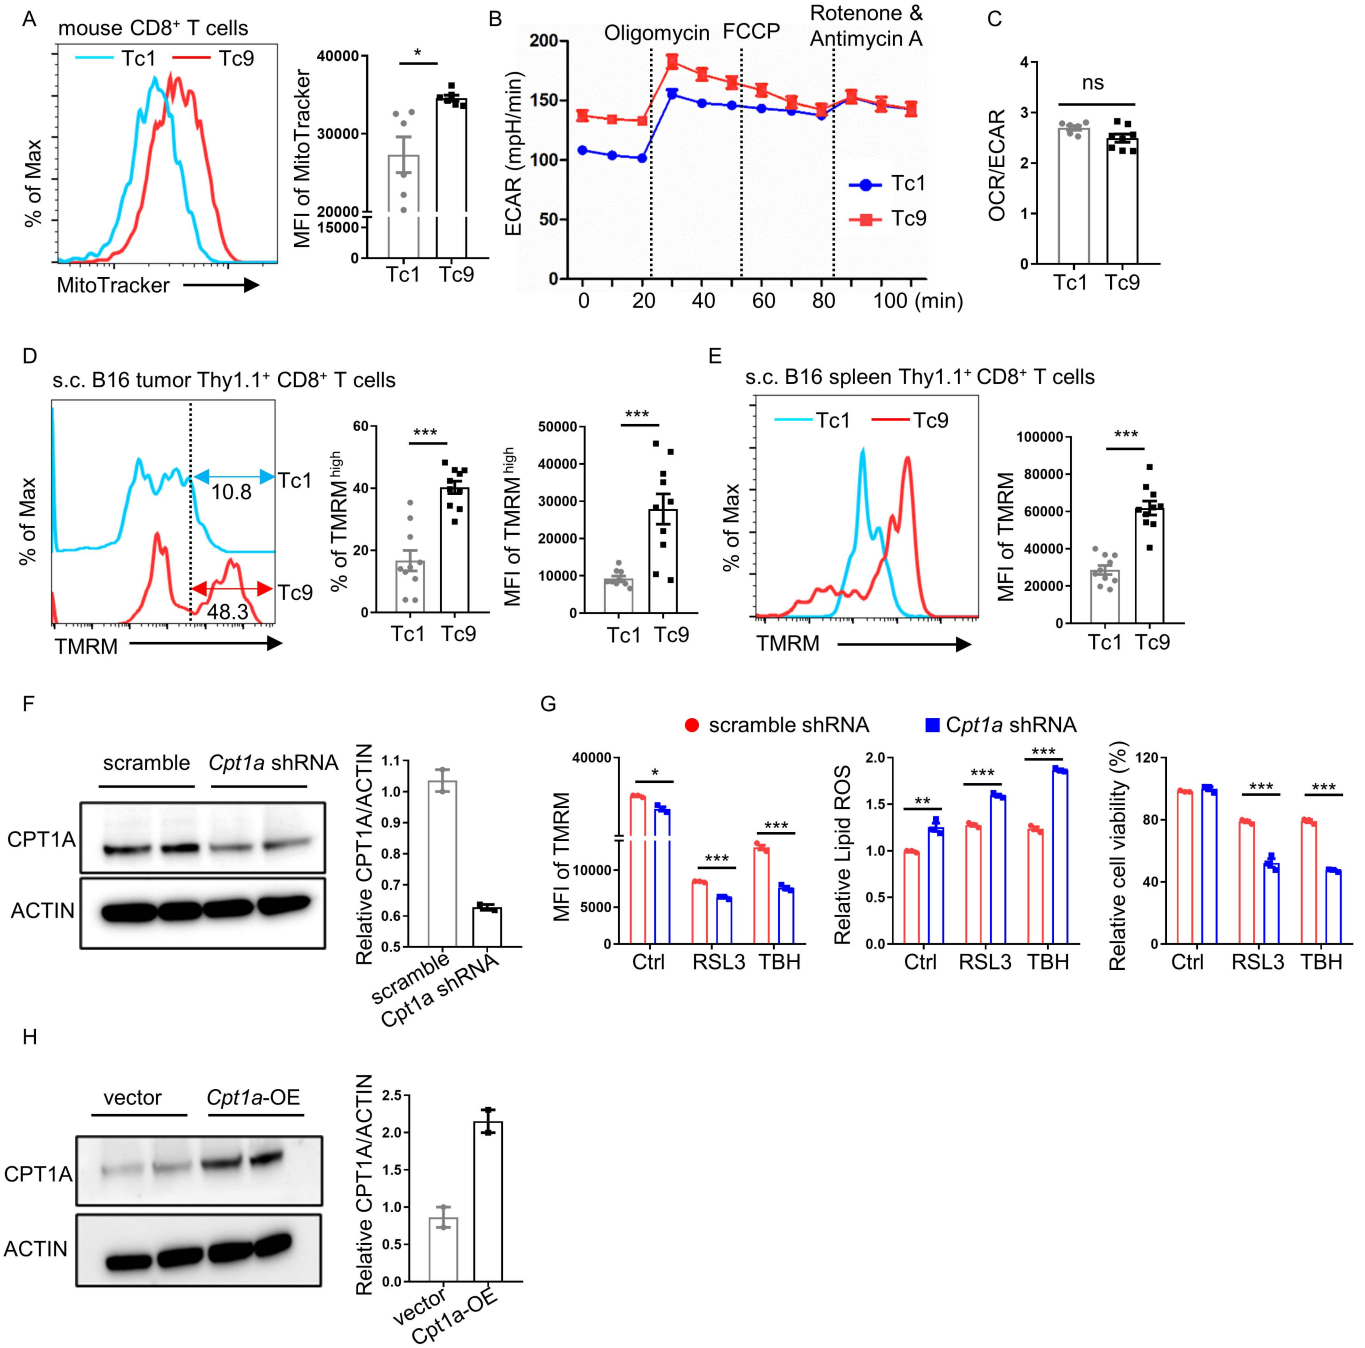

Supplementary Figure 7

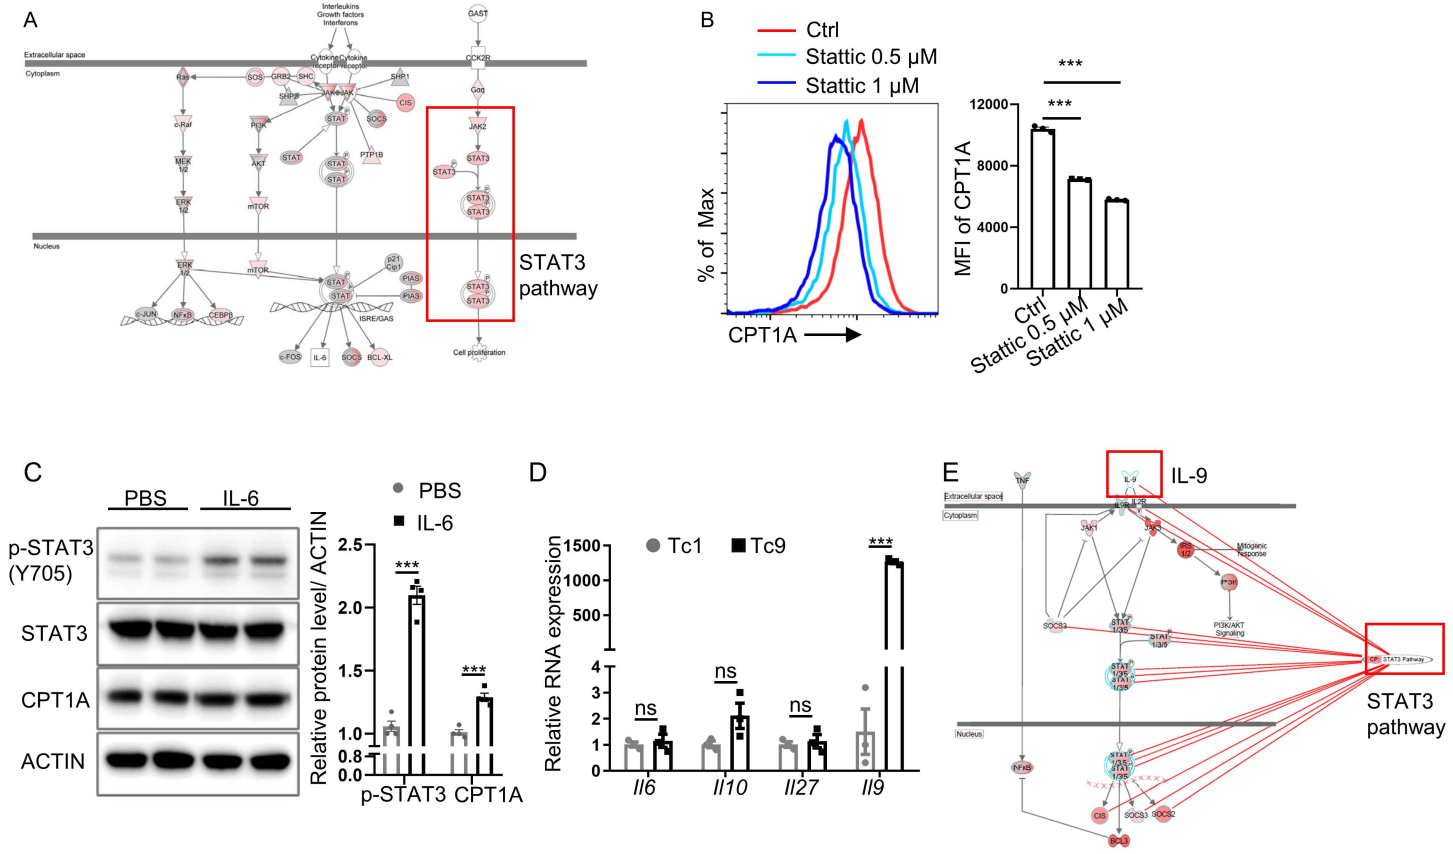

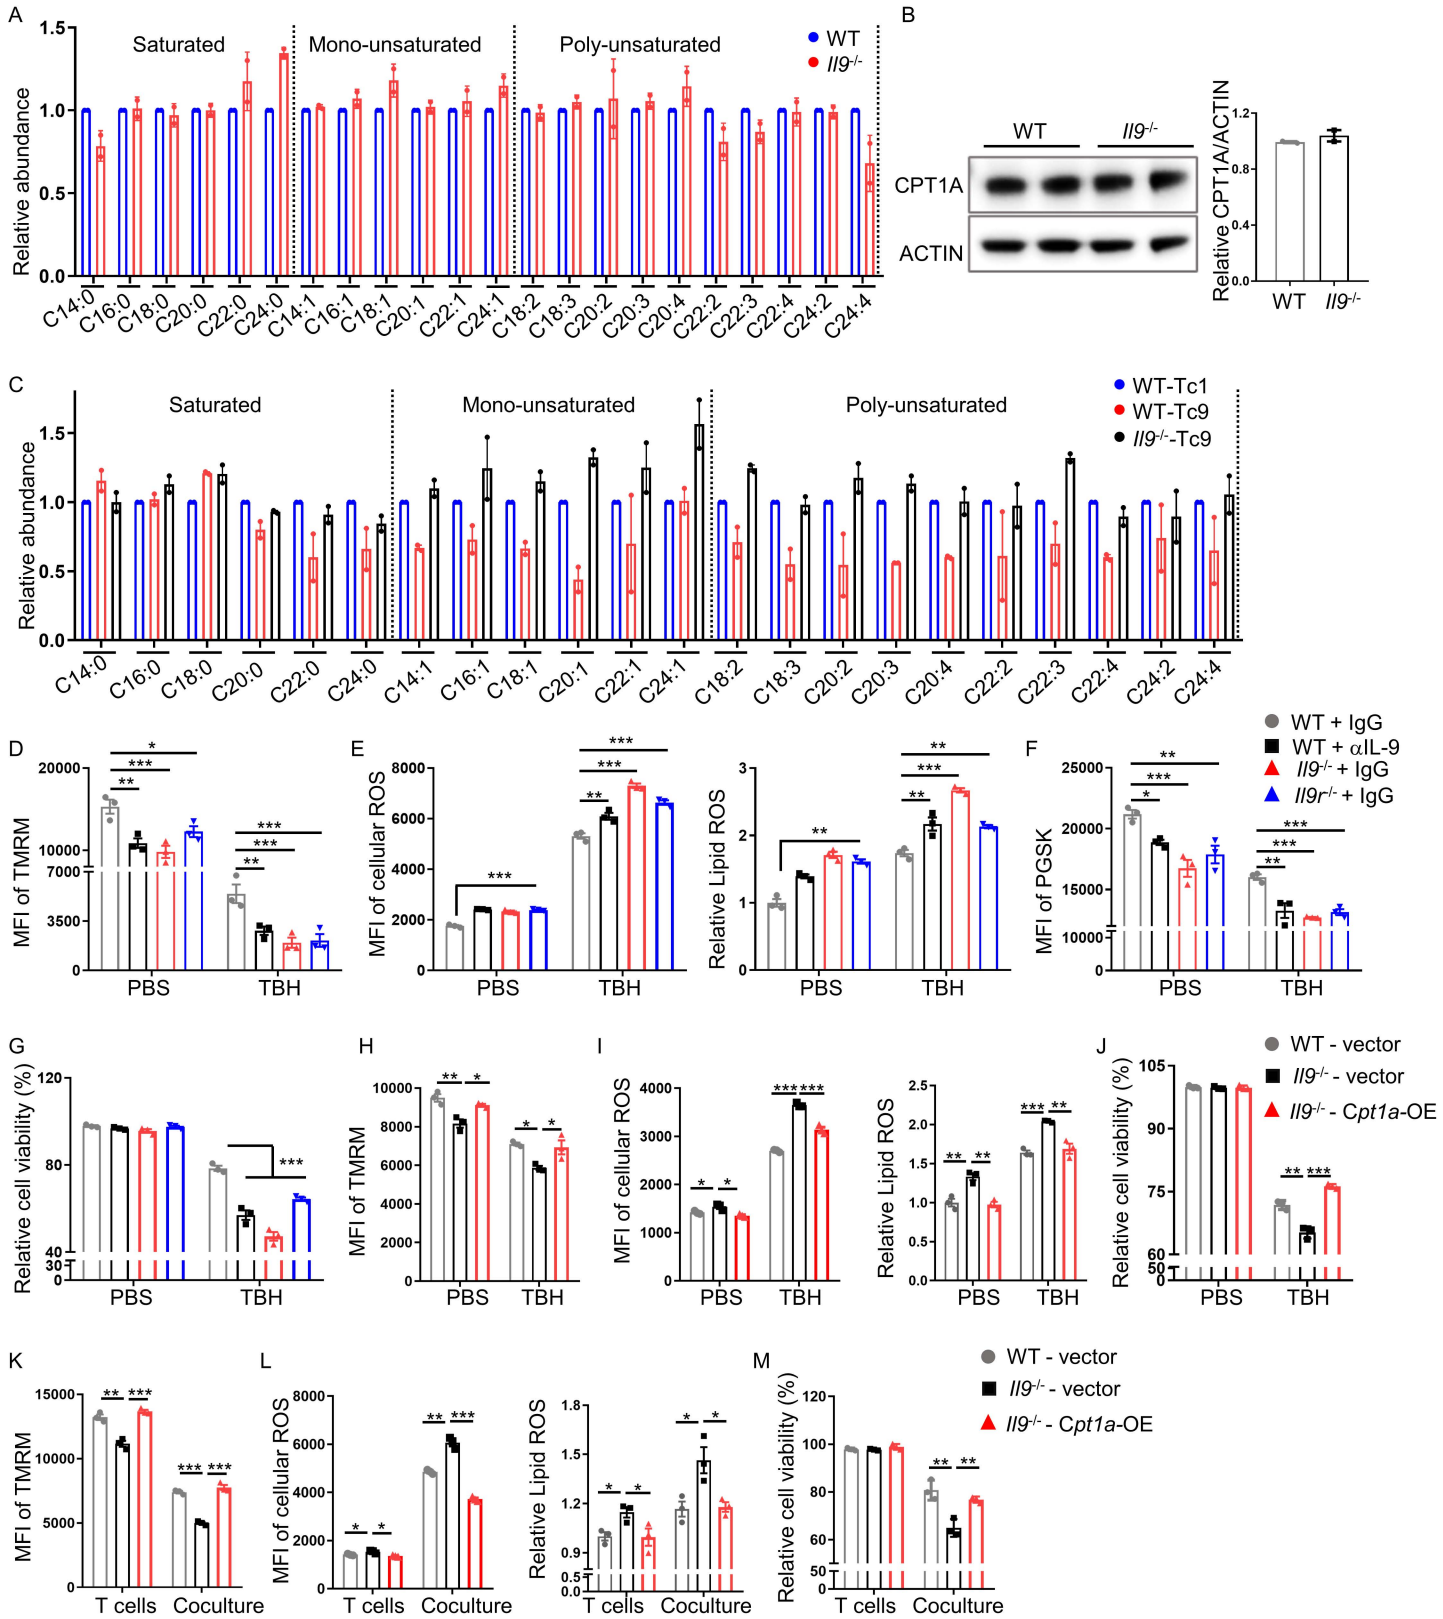

s.c. B16 circulating Thy1.1<sup>+</sup> CD8<sup>+</sup> T cells

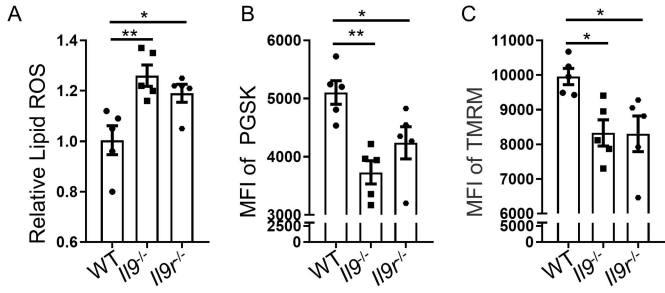

s.c. B16 circulating CD8<sup>+</sup> T cells

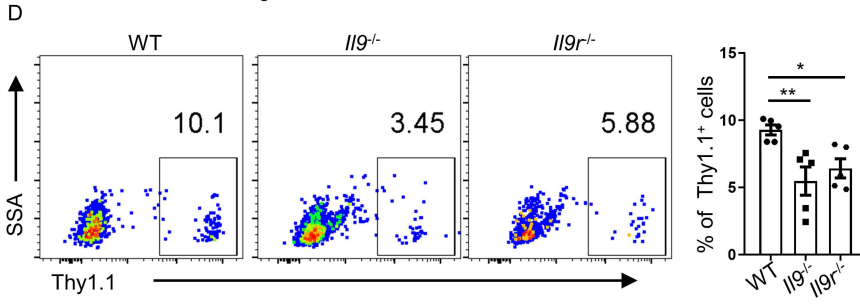

Supplementary Figure 10

s.c. B16 circulating Thy1.1<sup>+</sup> CD8<sup>+</sup> T cells

s.c. B16 circulating CD8<sup>+</sup> T cells

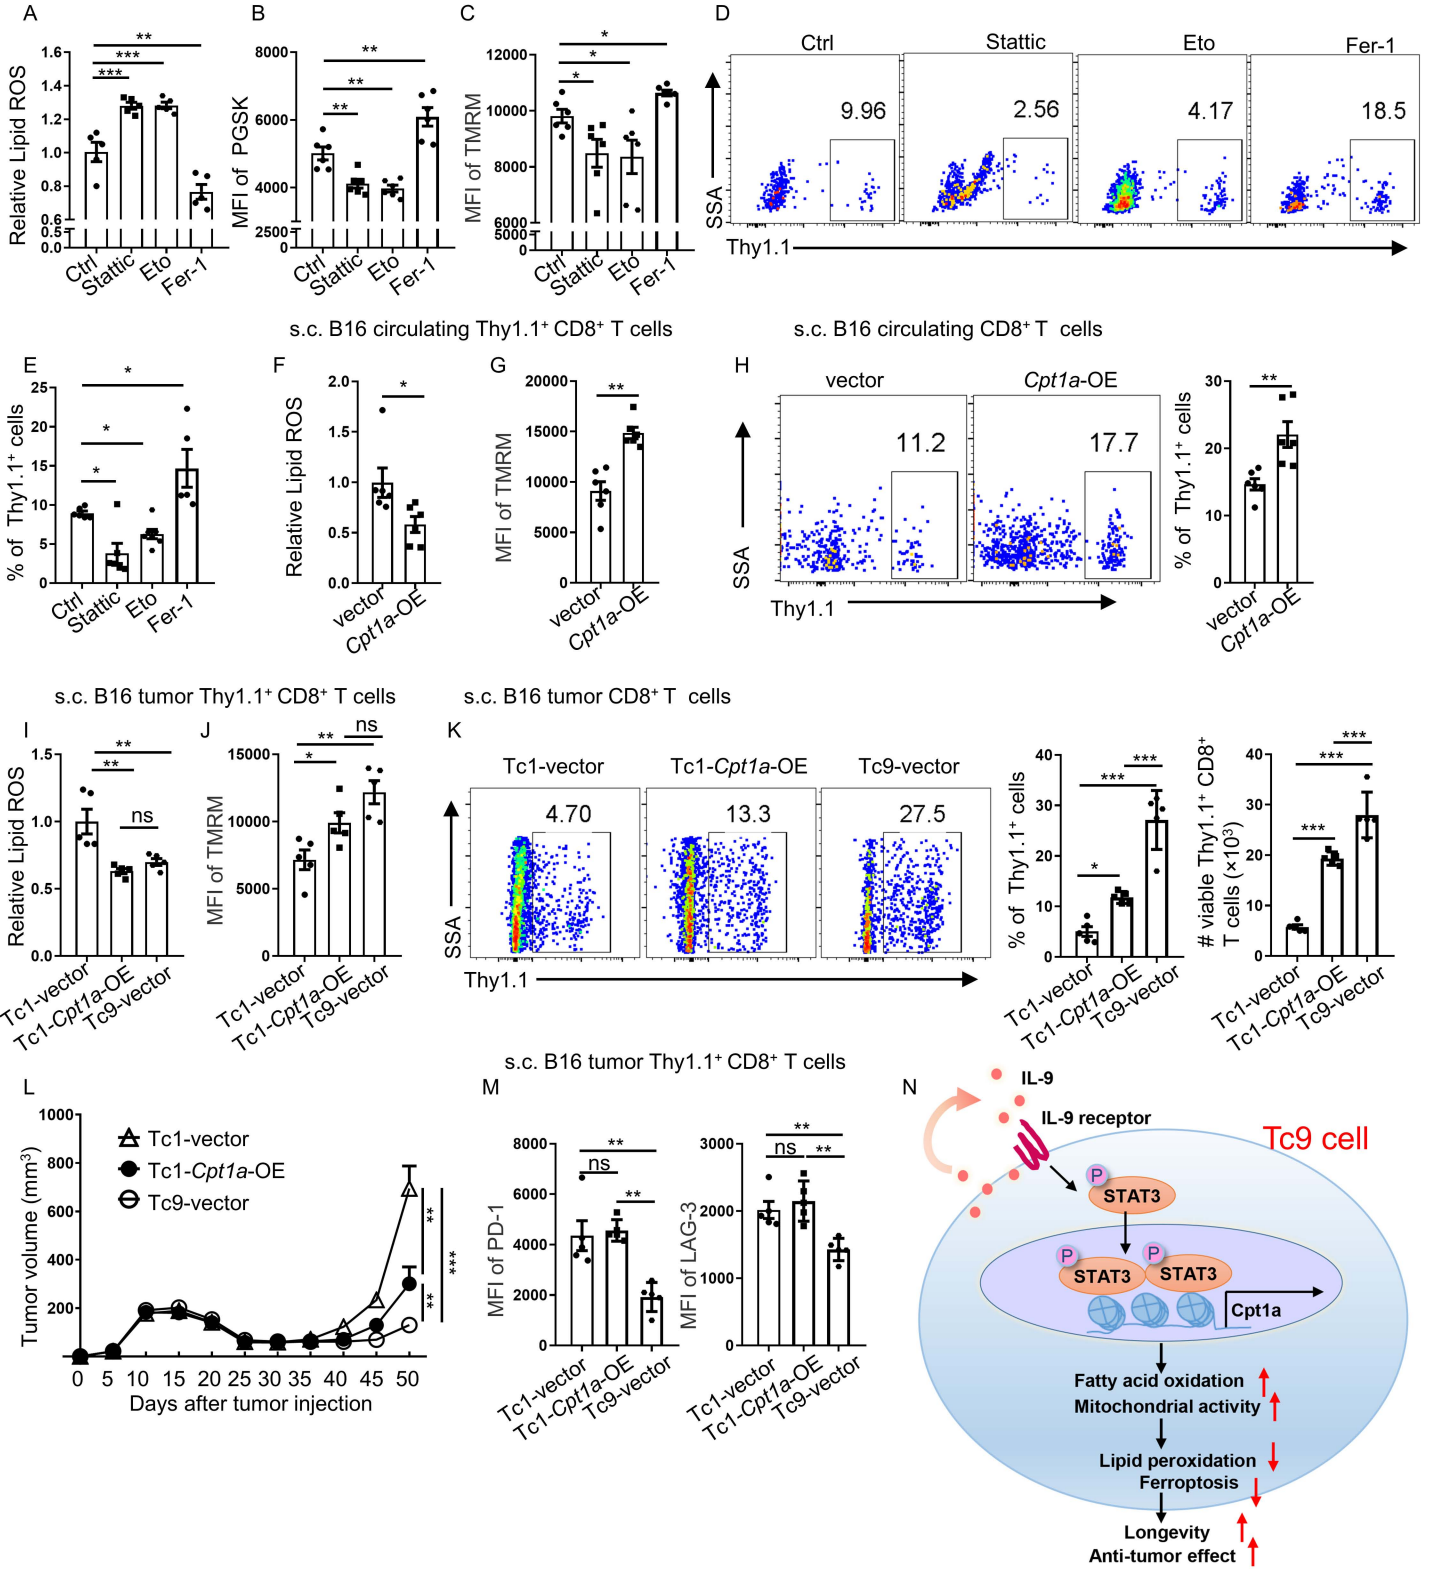

Supplement: sd1 [file 1]
